# Supplementary material for: Decoding distinctive features of plasma extracellular vesicles in amyotrophic lateral sclerosis
Source: bioRxiv or medRxiv preprint supplement (doi:10.1101/2020.08.06.20169300), 2021-05-26

## Supplementary Material

### Decoding distinctive features of plasma extracellular vesicles in amyotrophic lateral sclerosis

#### *Plasma extracellular vesicles and ALS*

Laura Pasetto<sup>1</sup>, Stefano Callegaro<sup>2</sup>, Deborah Ferrara<sup>3</sup>, Laura Brunelli<sup>1</sup>, Giovanna Sestito<sup>1</sup>, Roberta Pastorelli<sup>1</sup>, Elisa Bianchi<sup>1</sup>, Alessandro Corbelli<sup>1</sup>, Fabio Fiordaliso<sup>1</sup>, Marina Cretich<sup>4</sup>, Marcella Chiari<sup>4</sup>, Cristina Potrich<sup>5</sup>, Cristina Moglia<sup>6</sup>, Massimo Corbo<sup>7</sup>, Gianni Sorarù<sup>8</sup>, Christian Lunetta<sup>9</sup>, Andrea Calvo<sup>6</sup>, Adriano Chiò<sup>6</sup>, Gabriele Mora<sup>10</sup>, Maria Pennuto<sup>11,12</sup>, Alessandro Quattrone<sup>3</sup>, Francesco Rinaldi<sup>2</sup>, Vito D'Agostino<sup>3</sup>, Manuela Basso<sup>1,3\*</sup>, and Valentina Bonetto<sup>1\*</sup>

<sup>1</sup>Istituto di Ricerche Farmacologiche Mario Negri IRCCS, Milano (Italy)

<sup>2</sup> Department of Mathematics “Tullio Levi-Civita”, University of Padova

<sup>3</sup>Department of Cellular, Computational and Integrative Biology – CIBIO, University of Trento, Trento, Italy

<sup>4</sup>Consiglio Nazionale delle Ricerche, Istituto di Scienze e Tecnologie Chimiche “Giulio Natta” (SCITEC-CNR), Milano, Italy

<sup>5</sup> Centre for Materials and Microsystems, Fondazione Bruno Kessler, Trento, Italy & Istituto di Biofisica, Consiglio Nazionale delle Ricerche, Trento, Italy

<sup>6</sup>‘Rita Levi Montalcini’ Department of Neuroscience, Università degli Studi di Torino, Torino, Italy

<sup>7</sup>Department of Neurorehabilitation Sciences, Casa Cura Policlinico (CCP), Milano, Italy

<sup>8</sup> Department of Neuroscience, University of Padova, 35122 Padova, Italy

<sup>9</sup>NEuroMuscular Omnicentre (NEMO), Serena Onlus Foundation, Milano

<sup>10</sup>Department of Neurorehabilitation, ICS Maugeri IRCCS, Milano, Italy

<sup>11</sup> Department of Biomedical Sciences (DBS), University of Padova, 35131 Padova, Italy.

<sup>12</sup> Veneto Institute of Molecular Medicine (VIMM), 35129 Padova, Italy.

\*These are co-corresponding and co-last authors.

**Supplementary Figure 1. NBI enriches for a higher number and a smaller average diameter plasma EVs than classical ultracentrifugation (UC).** **A)** Immunoblotting for flotillin-1 in a pool of human plasma and relative Red Ponceau. '1°-2°-3°UC' stands for first, second, third ultracentrifugation. 'EVs' and 'Sur' are the pellet and supernatant after the UC. **B)** TEM of EVs purified with UC. Bar, 200 nm on the left; 100 nm and 200 nm in the insets on the right. **C)** TRPS analysis for the particle amount per ml (Particles/ml) with the NP200 nanopore of control plasma EVs (n=15) extracted with either NBI or UC. Student t-test; \*\*\*\*p<0.0001. **D)** TRPS analysis with the NP400 nanopore of control plasma EVs (n=15) for the particle amount per ml (Particles/ml) extracted with either NBI or UC. Student t-test; \*p=0.037. **E)** TRPS analysis with the NP200 nanopore of control plasma EVs (n=15) for the mean diameter (nm) extracted with either NBI or UC. Student t-test; \*\*\*\*p<0.0001. **F)** TRPS analysis with the NP200 nanopore of control plasma EVs (n=15) for the mean diameter (nm) extracted with either NBI or UC. Student t-test; \*\*\*\*p<0.0001. **G)** Purity index for samples extracted with NBI and UC, calculated by the ratio between the number of particles and the total micrograms of proteins detected in the relative EV samples; Student t-test; \*\*p=0.007. **H)** Size distribution of liposomes isolated with three independent NBI extractions (NBI1, NBI2, NBI3). **I)** Size distribution of liposomes isolated with three independent UC extractions (UC1, UC2, UC3). **J)** Venn diagram of the unique and shared EV identified proteins isolated by NBI and UC methods. Numbers in brackets refer to the number of proteins belonging to each class.

**Supplementary Figure 2. Zeta potential and additional size parameters for EV plasma of ALS, HC, MD and SBMA.** **A)** Box plot for the average zeta potential (z-potential) for ALS, HC, MD and SBMA. **B)** Box plot presenting the mode diameter (nm) of EVs purified from ALS, HC, MD and SBMA plasma. One-way ANOVA, p=0.019; Wilcoxon-Mann-Whitney *post hoc*, \*p=0.027 between ALS and MD. **C)** Box plot showing the D10 (nm) of EVs purified from ALS, HC, MD and SBMA plasma. One-way ANOVA, p=0.016; Wilcoxon-Mann-Whitney *post hoc*, \*\*p=0.005 between ALS and MD. **D)** Box plot showing the D50 (nm) of EVs purified from ALS, HC, MD and SBMA plasma. One-way ANOVA, p=0.002; Wilcoxon-Mann-Whitney *post hoc*, \*p=0.020 between ALS and MD, \*p=0.012 between ALS and SBMA. **E)** Box plot showing the D90 (nm) of EVs purified from ALS, HC, MD and SBMA plasma. One-way ANOVA, p=0.011; Wilcoxon-Mann-Whitney *post hoc*, \*p=0.027 between ALS and MD. **F)** Normalized curves. **G)** Representative image of the compressed size distribution using RBF. The green points are selected center, the black line is the initial signal and the red line is the RBF- output signal.

**Supplementary Figure 3. Representative immunoblotting for HSP-90 (A), phosphorylated TDP-43 (B) and PPIA (C) and relative red Ponceau in human EV samples.** IS means internal standard. F, familial; S, sporadic. The numbers appearing next to the different samples represent the actual number we assigned to each sample.

**Supplementary Figure 4. Set up for the immunoblotting against TDP-43 and phosphorylated TDP-43 in human and mouse plasma EVs, representative experiments.** **A)** Immunoblotting for anti-TDP-43 (C-terminus) in human samples. **B)** Immunoblotting for anti-TDP-43 (N-terminus) in human samples. **C)** Immunoblotting for anti-phosphorylated TDP-43 (pTDP-43) in human samples. **D)** Red Ponceau relative to A, B and C. **E)** Immunoblotting for anti-TDP-43 (N-terminus) in mouse samples. Asterisks indicate post translationally modified and truncated forms of TDP-43 that together with the form at 45-50 kDa were considered for WB quantification. **F)** Red Ponceau relative to E.

Supplementary Figure 1

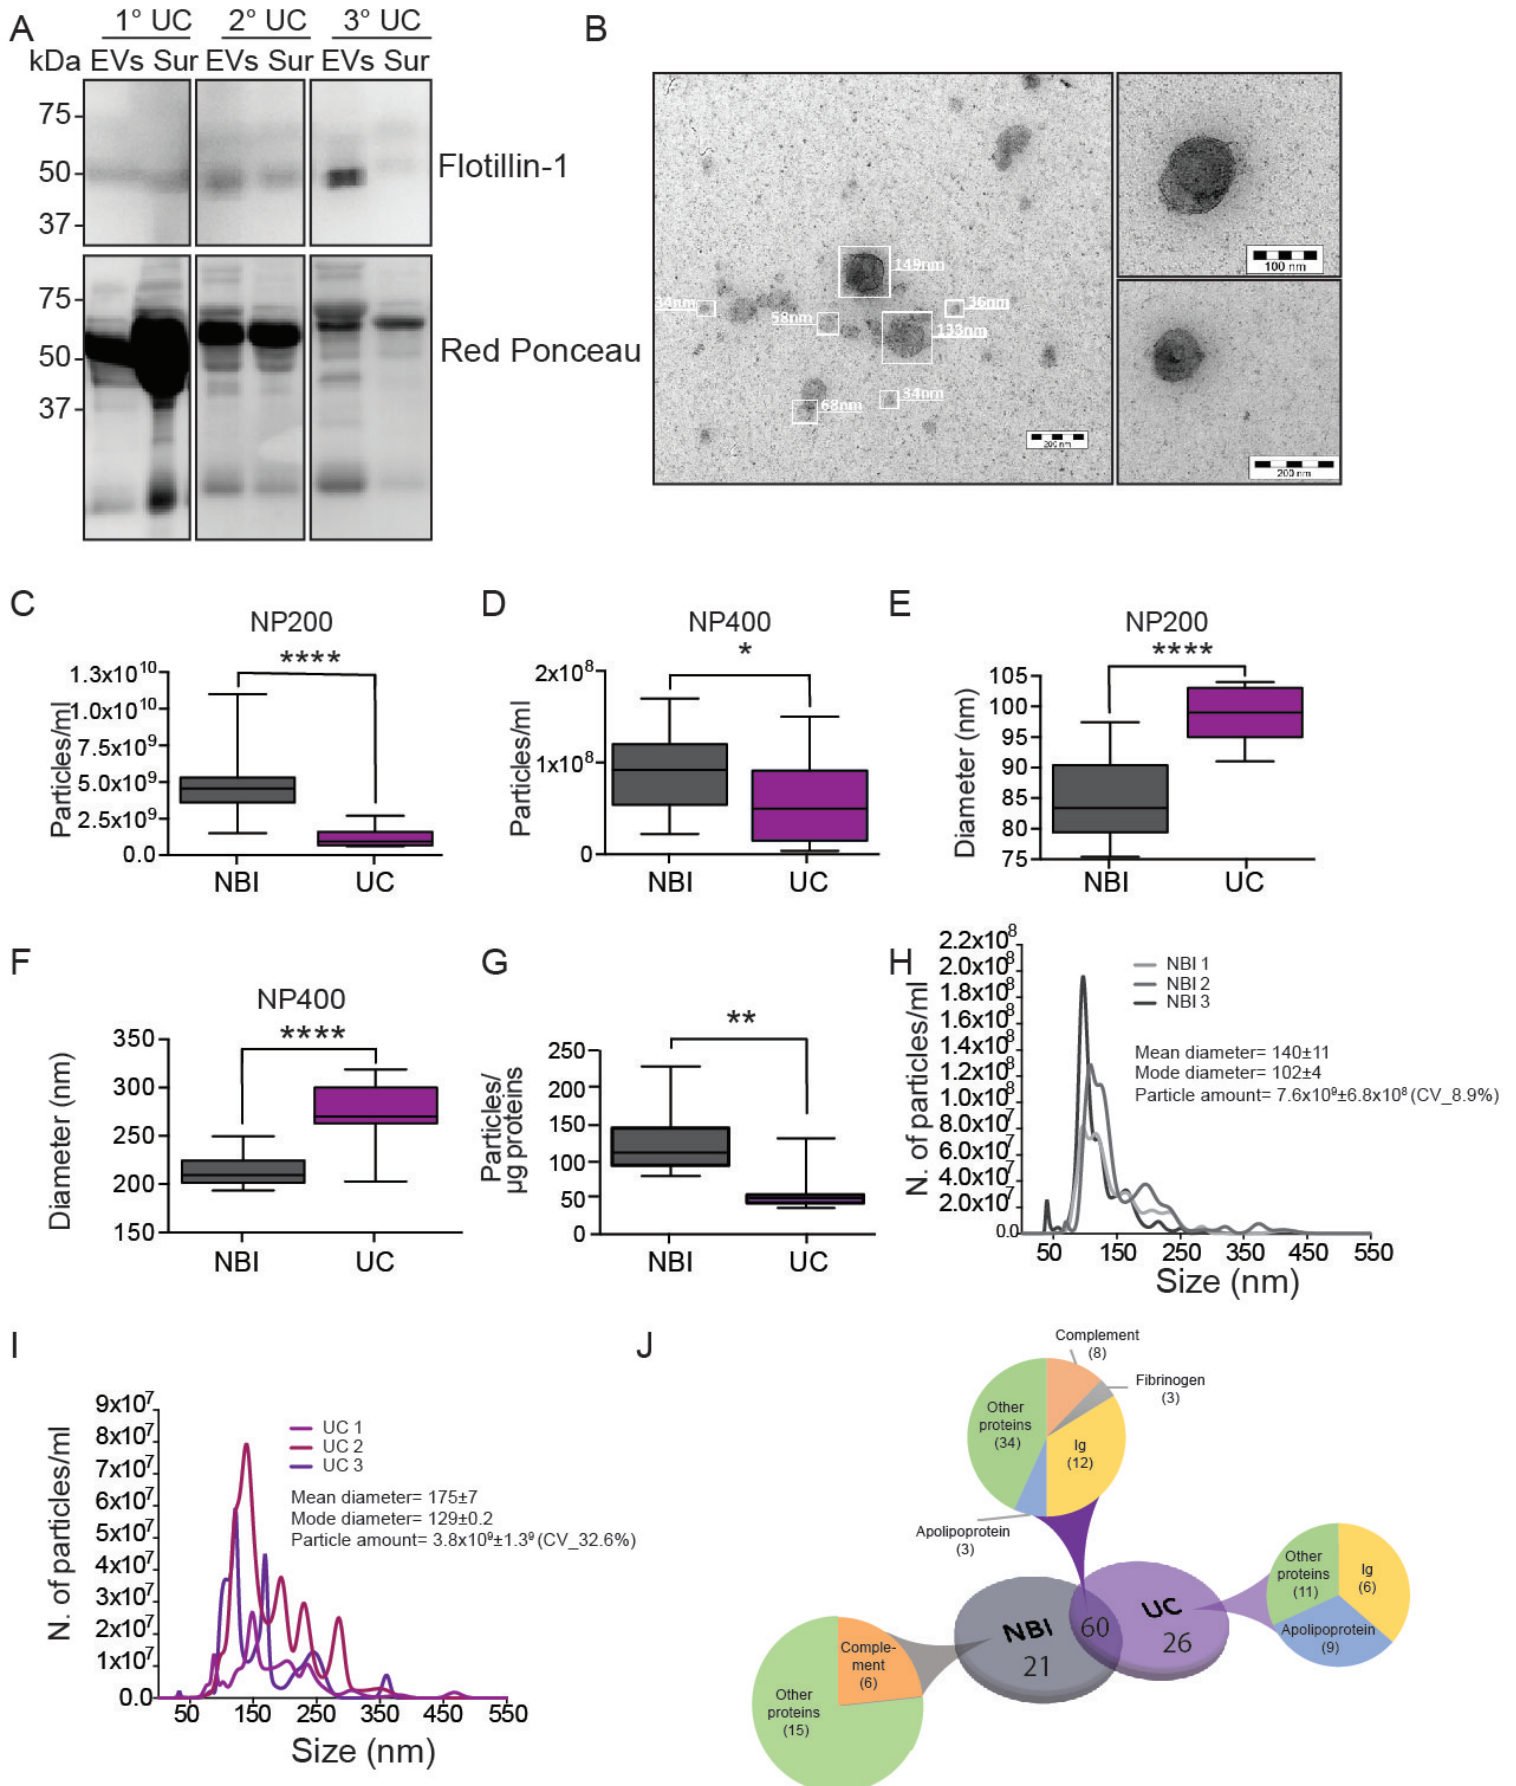

Supplementary Figure 2

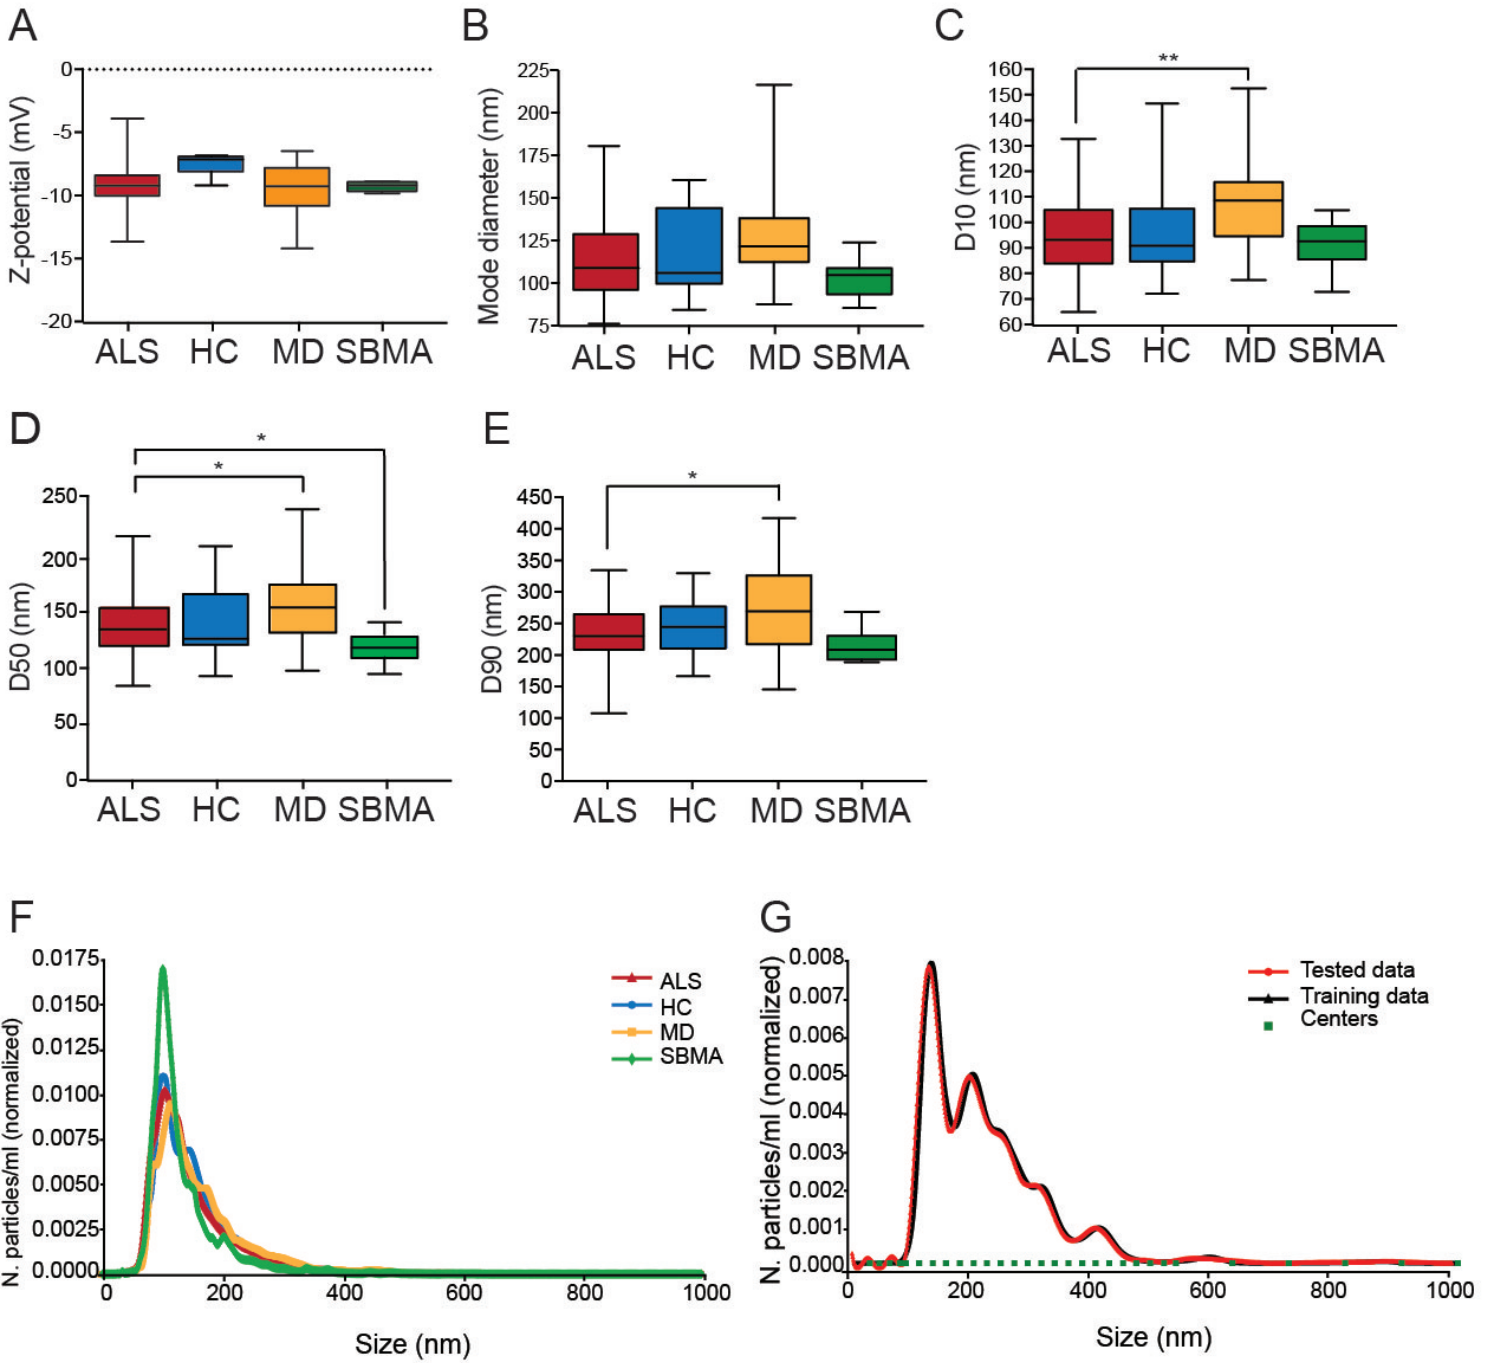

Supplementary Figure 3

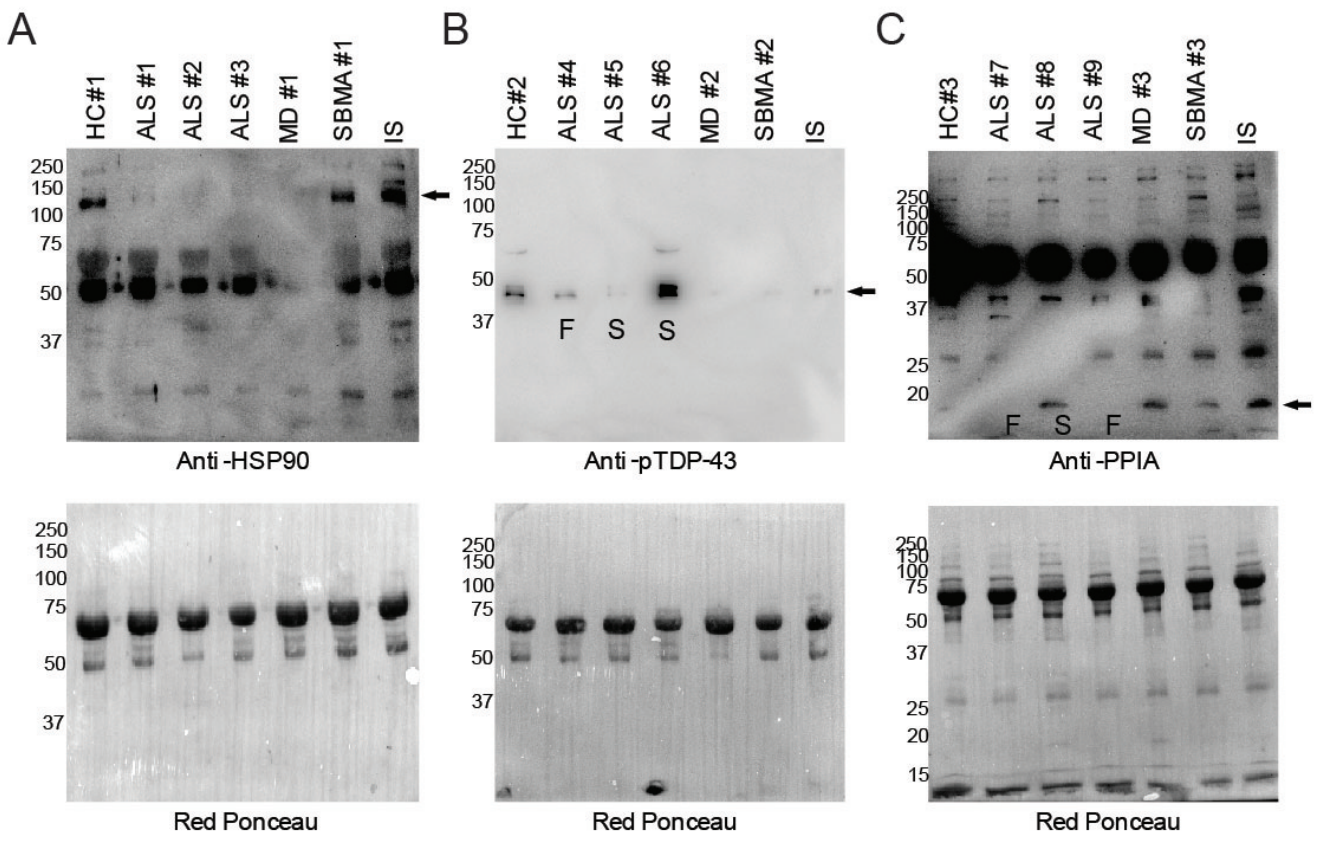

Supplementary Figure 4

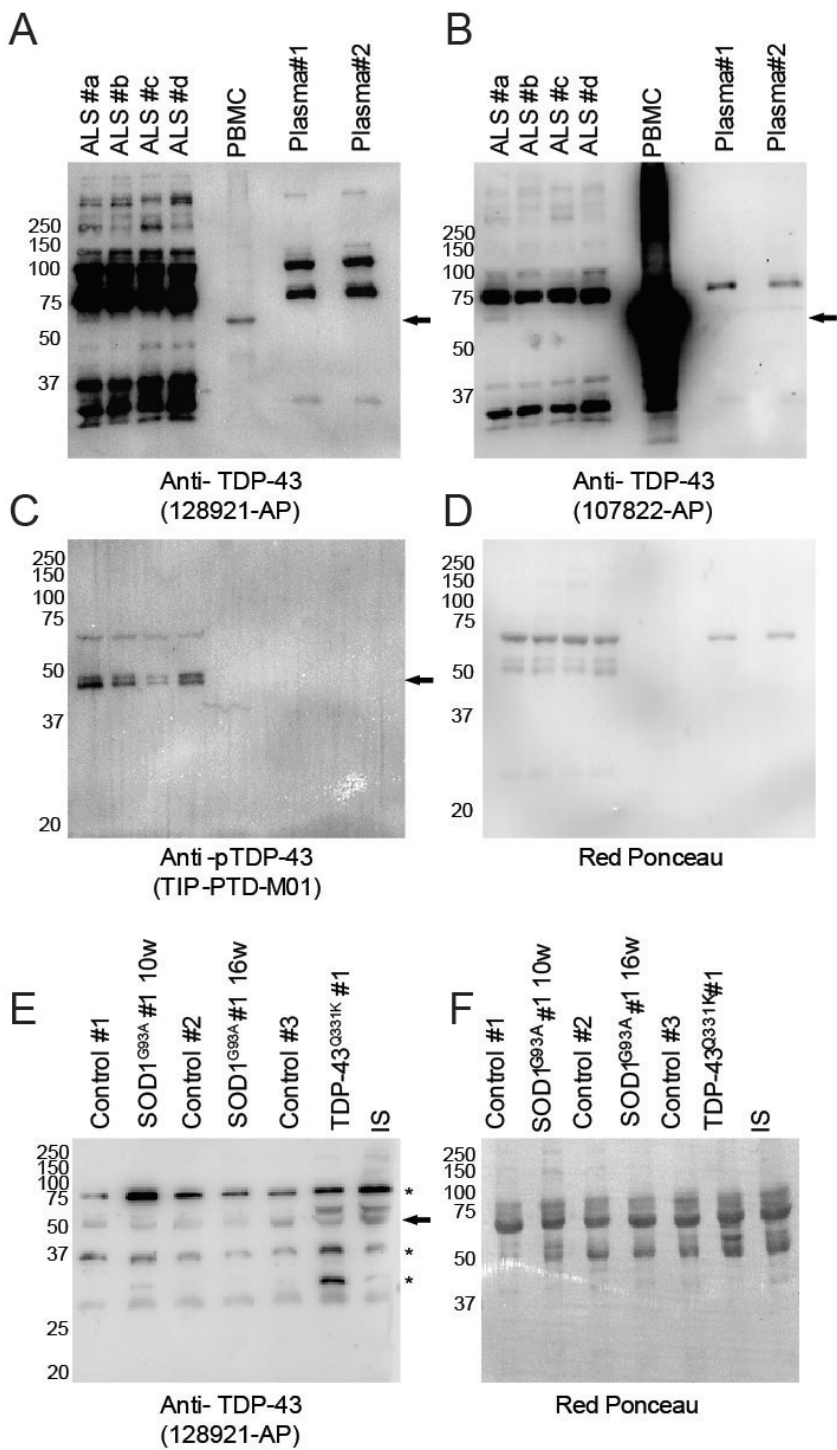

Supplement: Supplementary file [file 2020.08.06.20169300-1.pdf]
